# Supplementary material for: Heterometallic one-dimensional chain with tetradeca metal repetition constructed by amidate bridged dirhodium and pivalate bridged diplatinum complexes influenced by hydrogen bonding
Source: Royal Society of Chemistry journal article supplement (doi:10.1039/c6dt01601d), 2016-01-01
Supplement: c6dt01601d1.pdf [file c6dt01601d1.pdf]

## Supporting Information

**authors' names:** Tomofumi Yamada, Masahiro Ebihara, and Kazuhiro Uemura\*

**manuscript title:** Heterometallic one-dimensional chain with tetradeca metal repetition constructed by amidate bridged dirhodium and pivalate bridged diplatinum complexes influenced by hydrogen bonding

**name of the journal:** *Dalton Transactions*

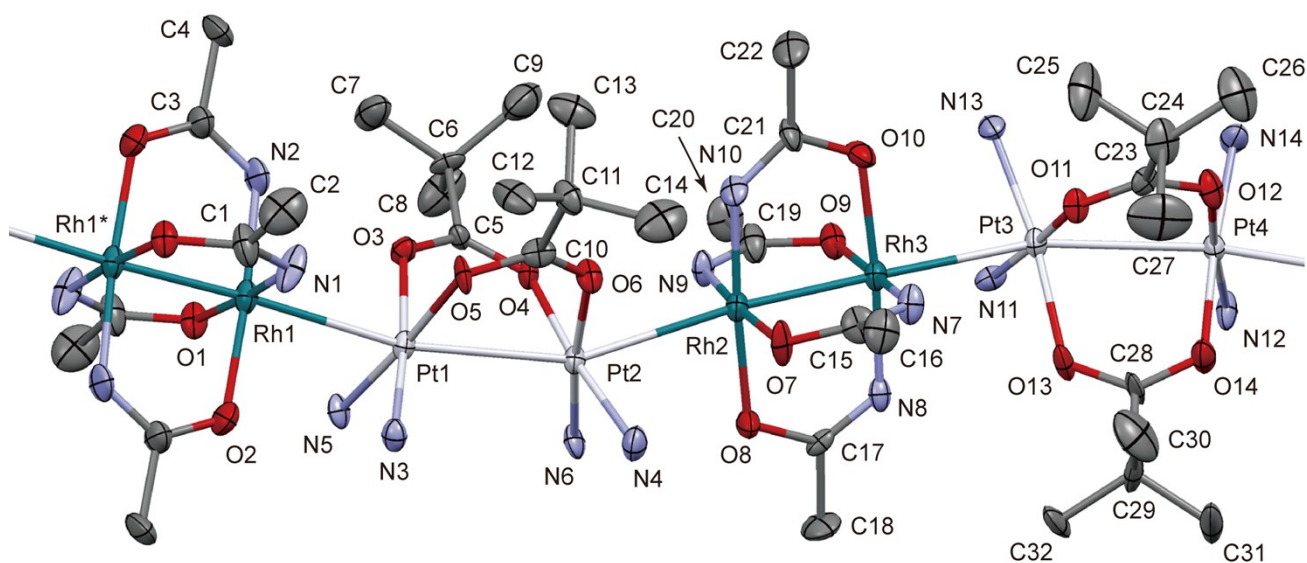

Figure S1. Crystal structure of  $[\{\text{Rh}_2(\text{acam})_4\}_3\{\text{Pt}_2(\text{OPiv})_2(\text{NH}_3)_4\}_4](\text{ClO}_4)_8$  (**4**). The hydrogen atoms and  $\text{ClO}_4^-$  ions are omitted for clarity.

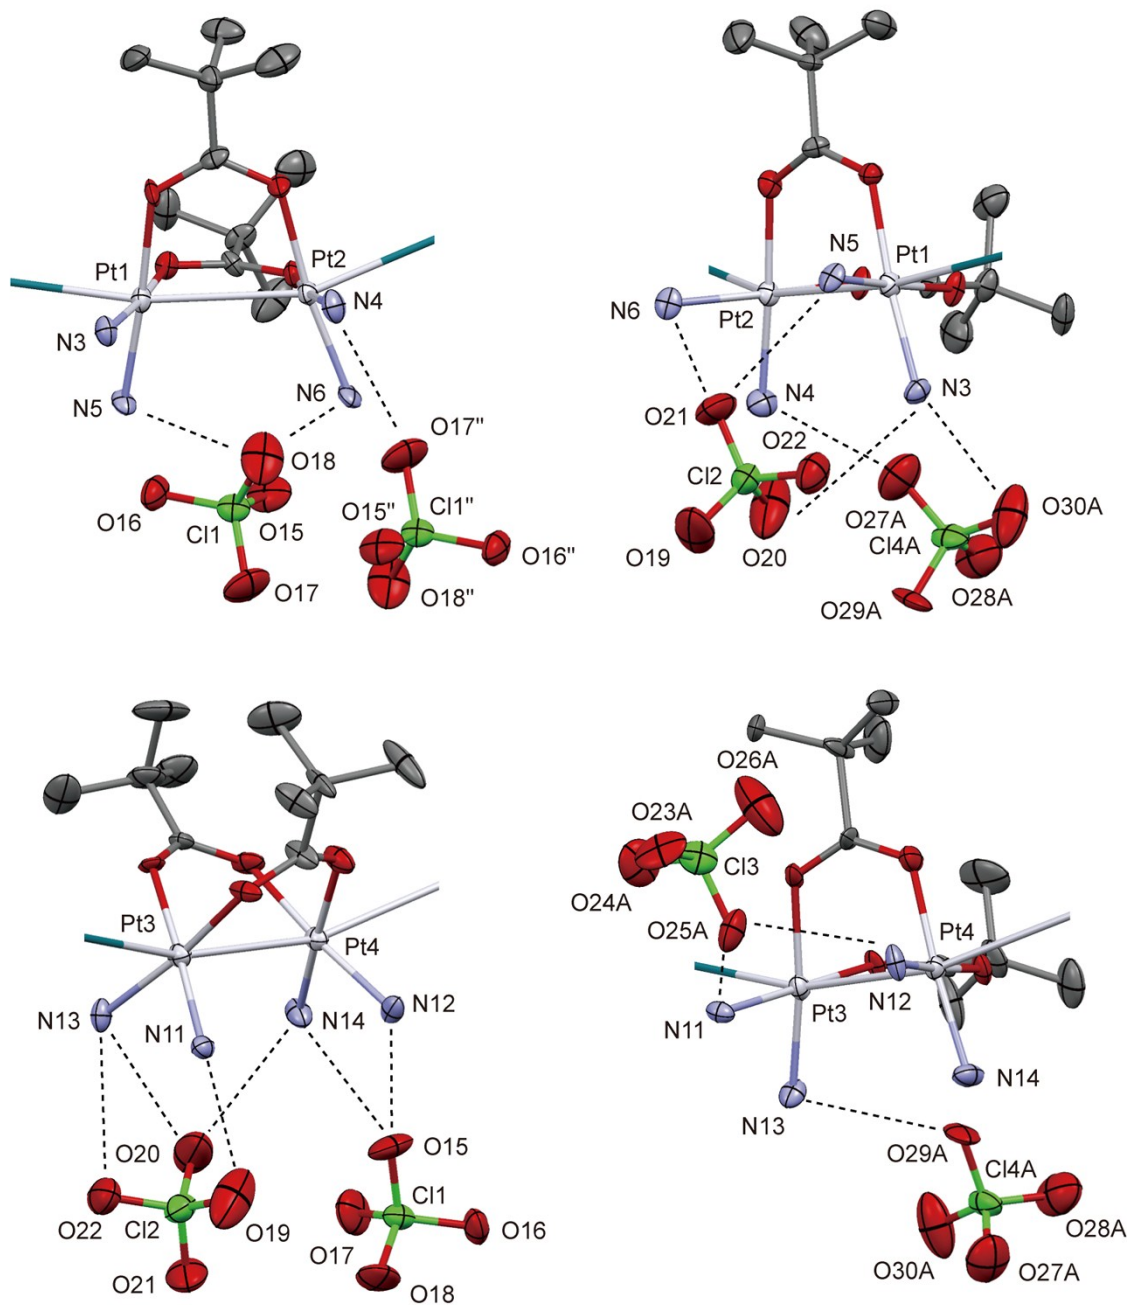

Figure S2. Hydrogen bonding fashion between 1-D chain and  $\text{ClO}_4^-$ . The hydrogen atoms are omitted for clarity.

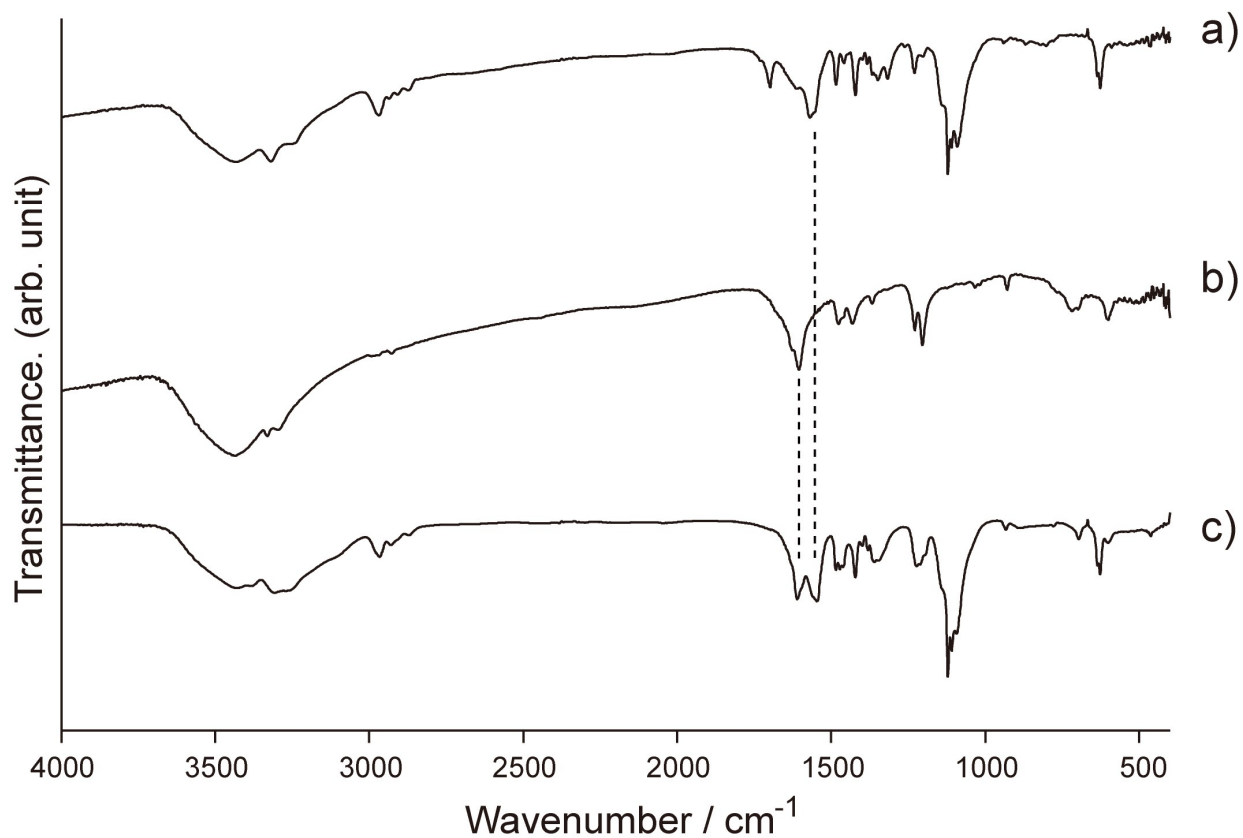

Figure S3. IR spectra of (a)  $[\text{Pt}_2(\text{OPiv})_2(\text{NH}_3)_4](\text{ClO}_4)_2 \cdot \text{PivOH}$ , (b)  $[\text{Rh}_2(\text{acam})_4(\text{H}_2\text{O})_2] \cdot 6\text{H}_2\text{O}$ , and (c) **4**. The bands around  $1122 \text{ cm}^{-1}$  are attributed to  $\text{ClO}_4^-$  anion. The  $\nu(\text{C}-\text{O})$  bands around  $1611$  and  $1546 \text{ cm}^{-1}$  which are attributed to *acam* and *OPiv*, respectively, are slightly shifted from those original compounds,  $[\text{Rh}_2(\text{acam})_4(\text{H}_2\text{O})_2] \cdot 6\text{H}_2\text{O}$  ( $1605 \text{ cm}^{-1}$ ) and  $[\text{Pt}_2(\text{OPiv})_2(\text{NH}_3)_4](\text{ClO}_4)_2 \cdot \text{PivOH}$  ( $1570 \text{ cm}^{-1}$ ).
